# Supplementary material for: Problematic Gaming during COVID-19 Pandemic: A Systematic Review, Meta-Analysis, and Meta-Regression
Source: MDPI journal article supplement (doi:10.3390/healthcare11243176), 2023-12-15
Supplement: s1 [file s1]

## **Supplementary S2. Search strategy.**

### **GOOGLE SCHOLAR: string search**

(COVID-19 OR coronavirus OR 2019-ncov OR sars-cov-2 OR lockdown) AND (gaming OR videogam\*)

### **MEDLINE (EBSCO): string search (example under Abstracts)**

AB covid-19 AND AB coronavirus AND AB 2019-ncov AND AB sars-cov-2 AND AB lockdown OR AB gaming AND AB videogam\*

### **PUBMED: string search**

(((((covid-19[Title/Abstract]) OR (coronavirus[Title/Abstract])) OR (2019-ncov[Title/Abstract])) OR (sars-cov-2[Title/Abstract])) OR (lockdown[Title/Abstract])) AND (gaming[Title/Abstract]) OR (videogam\*[Title/Abstract]))

### **SCIENCE DIRECT: string search**

(COVID-19 OR coronavirus OR 2019-ncov OR sars-cov-2 OR lockdown) AND (gaming OR videogame)

### **SCOPUS: string search**

(COVID-19 OR coronavirus OR 2019-ncov OR sars-cov-2 OR lockdown) AND (gaming OR videogam\*)
