# Supplementary material for: Problematic Gaming during COVID-19 Pandemic: A Systematic Review, Meta-Analysis, and Meta-Regression
Source: MDPI journal article supplement (doi:10.3390/healthcare11243176), 2023-12-15
Supplement: s1 [file s1]

**Supplementary S4.** List of included references ( $N = 62$ ).

1. Alqassim, A., S. Mahfouz, M., M. Hakami, M., A. Al Faqih, A., A. Shugairi, A., R. Alsanosy, M., Y. Rayyani, A., Y. Albrraq, A., A. Muaddi, M., & A. Alharbi, A. (2022). Depression, anxiety, stress and their association with the use of electronic devices among adolescents during the COVID-19 pandemic. *International Journal of Mental Health Promotion*, 24(2), 251–262. <https://doi.org/10.32604/ijmhp.2022.019000>
2. Al-Sharqi, M. A., & Hasan, H. S. (2022). Neural network to investigate gaming addiction and its impact on health effects during the COVID-19 Pandemic. *Periodicals of Engineering and Natural Sciences (PEN)*, 10(1), 504. <https://doi.org/10.21533/pen.v10i1.2713>
3. Balhara, Y. S., Kattula, D., Singh, S., Chukkali, S., & Bhargava, R. (2020). Impact of lockdown following COVID-19 on the gaming behavior of college students. *Indian Journal of Public Health*, 64(6), 172. [https://doi.org/10.4103/ijph.IJPH\\_465\\_20](https://doi.org/10.4103/ijph.IJPH_465_20)
4. Brailovskaia, J., Meier-Faust, J., Schillack, H., & Margraf, J. (2022). A two-week gaming abstinence reduces Internet Gaming Disorder and improves mental health: An experimental longitudinal intervention study. *Computers in Human Behavior*, 134, 107334. <https://doi.org/10.1016/j.chb.2022.107334>
5. Cakiroglu, S., Soylu, N., Department of Child and Adolescent Psychiatry, Istanbul University Istanbul School of Medicine, Istanbul, Turkey, Gormez, V., & Department of Child and Adolescent Psychiatry, Istanbul Medeniyet University Goztepe Training and Research Hospital, Istanbul, Turkey. (2021). Re-evaluating the digital gaming profiles of children and adolescents during the COVID-19 pandemic: A comparative analysis

- comprising 2 years of pre-pandemic data. *Addicta: The Turkish Journal on Addictions*, 8(1), 51–57. <https://doi.org/10.5152/ADDICTA.2021.21019>
6. (Update) Cena, L., Rota, M., Calza, S., Trainini, A., Zecca, S., Zappa, S. B., Nodari, L. S., & Stefana, A. (2022). Prevalence and types of video gaming and gambling activities among adolescent public school students: Findings from a cross-sectional study in Italy. *Italian Journal of Pediatrics*, 48(1), 108. <https://doi.org/10.1186/s13052-022-01299-2>
  7. Chang, C. I., Fong Sit, H., Chao, T., Chen, C., Shen, J., Cao, B., Montag, C., Elhai, J. D., & Hall, B. J. (2022). Exploring subtypes and correlates of internet gaming disorder severity among adolescents during COVID-19 in China: A latent class analysis. *Current Psychology*. <https://doi.org/10.1007/s12144-022-03133-8>
  8. Chen, C.-Y., Chen, I.-H., Hou, W.-L., Potenza, M. N., O'Brien, K. S., Lin, C.-Y., & Latner, J. D. (2022). The relationship between children's problematic Internet-related behaviors and psychological distress during the onset of the COVID-19 pandemic: A longitudinal study. *Journal of Addiction Medicine*, 16(2), e73–e80. <https://doi.org/10.1097/ADM.0000000000000845>
  9. Chen, C.-Y., Chen, I.-H., O'Brien, K. S., Latner, J. D., & Lin, C.-Y. (2021). Psychological distress and internet-related behaviors between schoolchildren with and without overweight during the COVID-19 outbreak. *International Journal of Obesity*, 45(3), 677–686. <https://doi.org/10.1038/s41366-021-00741-5>
  10. Chen, C.-Y., Chen, I.-H., Pakpour, A. H., Lin, C.-Y., & Griffiths, M. D. (2021). Internet-related behaviors and psychological distress among schoolchildren during the COVID-19 school hiatus. *Cyberpsychology, Behavior, and Social Networking*, 24(10), 654–663. <https://doi.org/10.1089/cyber.2020.0497>

11. Chen, I. H., Chen, C. Y., Liu, C. H., Ahorsu, D. K., Griffiths, M. D., Chen, Y. P., Kuo, Y. J., Lin, C. Y., Pakpour, A. H., & Wang, S. M. (2021). Internet addiction and psychological distress among Chinese schoolchildren before and during the COVID-19 outbreak: A latent class analysis. *Journal of Behavioral Addictions*, 10(3), 731–746.  
<https://doi.org/10.1556/2006.2021.00052>
12. (Update) Chen, I., Chen, H., Gamble, J., Liao, X., Chen, X., Yang, Y., Pakpour, A., Griffiths, M., & Lin, C. (2022). Evaluating a cross-lagged panel model between problematic internet use and psychological distress and cross-level mediation of school administrator support on problematic internet use: The serial mediating role of psychological needs thwarting of online teaching and psychological distress. *Frontiers in Public Health*, 10, 987366. <https://doi.org/10.3389/fpubh.2022.987366>
13. Chen, I.-H., Chen, C.-Y., Pakpour, A. H., Griffiths, M. D., Lin, C.-Y., Li, X.-D., & Tsang, H. W. H. (2021). Problematic Internet-related behaviors mediate the associations between levels of internet engagement and distress among schoolchildren during COVID-19 lockdown: A longitudinal structural equation modeling study. *Journal of Behavioral Addictions*, 10(1), 135–148. <https://doi.org/10.1556/2006.2021.00006>
14. Chen, I.-H., Lin, Y.-C., Lin, C.-Y., Wang, W.-C., & Gamble, J. H. (2022). The trajectory of psychological distress and problematic Internet gaming among primary school boys: A longitudinal study across different periods of COVID-19 in China. *Journal of Men's Health*, 18(3), 070. <https://doi.org/10.31083/j.jomh1803070>
15. Ciccarelli, M., Nigro, G., D'Olimpio, F., Griffiths, M. D., Sacco, M., Pizzini, B., & Cosenza, M. (2022). The associations between loneliness, anxiety, and problematic gaming behavior during the COVID-19 pandemic: The mediating role of mentalization.

*Mediterranean Journal of Clinical Psychology, Vol 10, No 1 (2022).*

<https://doi.org/10.13129/2282-1619/MJCP-3257>

16. Claesdotter-Knutsson, E., André, F., & Håkansson, A. (2022). Gaming activity and possible changes in gaming behavior among young people during the COVID-19 pandemic: Cross-sectional online survey study. *JMIR Serious Games, 10*(1), e33059.  
<https://doi.org/10.2196/33059>
17. Cuong, V. M., Assanangkornchai, S., Wichaidit, W., Minh Hanh, V. T., & My Hanh, H. T. (2021). Associations between gaming disorder, parent-child relationship, parental supervision, and discipline styles: Findings from a school-based survey during the COVID-19 pandemic in Vietnam. *Journal of Behavioral Addictions, 10*(3), 722–730.  
<https://doi.org/10.1556/2006.2021.00064>
18. De Pasquale, C., Chiappedi, M., Sciacca, F., Martinelli, V., & Hichy, Z. (2021). Online videogames use and anxiety in children during the COVID-19 pandemic. *Children, 8*(3), 205. <https://doi.org/10.3390/children8030205>
19. Donati, M. A., Guido, C. A., De Meo, G., Spalice, A., Sanson, F., Beccari, C., & Primi, C. (2021). Gaming among children and adolescents during the COVID-19 lockdown: The role of parents in time spent on video games and gaming disorder symptoms. *International Journal of Environmental Research and Public Health, 18*(12), 6642.  
<https://doi.org/10.3390/ijerph18126642>
20. Efrati, Y., & Spada, M. M. (2022). Self-perceived substance and behavioral addictions among Jewish Israeli adolescents during the COVID-19 pandemic. *Addictive Behaviors Reports, 15*, 100431. <https://doi.org/10.1016/j.abrep.2022.100431>

21. Elhai, J. D., McKay, D., Yang, H., Minaya, C., Montag, C., & Asmundson, G. J. G. (2021). Health anxiety related to problematic smartphone use and gaming disorder severity during COVID-19: Fear of missing out as a mediator. *Human Behavior and Emerging Technologies*, 3(1), 137–146. <https://doi.org/10.1002/hbe2.227>
22. Elsayed, W. (2021). Covid-19 pandemic and its impact on increasing the risks of children's addiction to electronic games from a social work perspective. *Heliyon*, 7(12), e08503. <https://doi.org/10.1016/j.heliyon.2021.e08503>
23. Fernandes, B., Nanda Biswas, U., Tan-Mansukhani, R., Vallejo, A., & Essau, C. A. (2020). The impact of COVID-19 lockdown on Internet use and escapism in adolescents. *Revista de Psicología Clínica Con Niños y Adolescentes*, 7(nº 3), 59–65. <https://doi.org/10.21134/rpcna.2020.mon.2056>
24. Giardina, A., Di Blasi, M. D. B., Schimmenti, A., King, D. L., Starcevic, V., & Billieux, J. (2021). Online gaming and prolonged self-isolation: Evidence from Italian gamers during the COVID-19 outbreak. *Clinical Neuropsychiatry*, 18(1), 65–74. <https://doi.org/10.36131/cnfioritieditore20210106>
25. Gómez Galán, J., Lázaro-Pérez, C., & Martínez-López, J. Á. (2021). Exploratory study on video game addiction of college students in a pandemic scenario. *Journal of New Approaches in Educational Research*, 10(2), 330. <https://doi.org/10.7821/naer.2021.7.750>
26. Hall, L. C., Drummond, A., Sauer, J. D., & Ferguson, C. J. (2021). Effects of self-isolation and quarantine on loot box spending and excessive gaming—Results of a natural experiment. *PeerJ*, 9, e10705. <https://doi.org/10.7717/peerj.10705>
27. Higuchi, S., Mihara, S., Kitayuguchi, T., Miyakoshi, H., Ooi, M., Maezono, M., Nishimura, K., & Matsuzaki, T. (2020). Prolonged use of Internet and gaming among

treatment seekers arising out of social restrictions related to COVID-19 pandemic.

*Psychiatry and Clinical Neurosciences*, 74(11), 607–608.

<https://doi.org/10.1111/pcn.13127>

28. Ismail, N., Tajjudin, A. I., Jaafar, H., Nik Jaafar, N. R., Baharudin, A., & Ibrahim, N. (2021). The relationship between Internet addiction, Internet gaming and anxiety among medical students in a Malaysian public university during COVID-19 pandemic. *International Journal of Environmental Research and Public Health*, 18(22), 11870. <https://doi.org/10.3390/ijerph182211870>
29. Kim, D., & Lee, J. (2021). Addictive Internet gaming usage among Korean adolescents before and after the outbreak of the COVID-19 pandemic: A comparison of the latent profiles in 2018 and 2020. *International Journal of Environmental Research and Public Health*, 18(14), 7275. <https://doi.org/10.3390/ijerph18147275>
30. Kim, D., Lee, J., & Nam, J. K. (2021). Latent profile of Internet and Internet game usage among South Korean adolescents during the COVID-19 pandemic. *Frontiers in Psychiatry*, 12, 714301. <https://doi.org/10.3389/fpsyt.2021.714301>
31. Koós, M., Demetrovics, Z., Griffiths, M. D., & Bőthe, B. (2022). No significant changes in addictive and problematic behaviors during the COVID-19 pandemic and related lockdowns: A three-wave longitudinal study. *Frontiers in Psychology*, 13, 837315. <https://doi.org/10.3389/fpsyg.2022.837315>
32. Maraz, A., Katzinger, E., & Yi, S. (2021). Potentially addictive behaviours increase during the first six months of the Covid-19 pandemic. *Journal of Behavioral Addictions*, 10(4), 912–919. <https://doi.org/10.1556/2006.2021.00079>

33. Müller, S. M., Wegmann, E., Garcia Arias, M., Bernabéu Brotóns, E., Marchena Giráldez, C., & Brand, M. (2022). Decision making and risk propensity in individuals with tendencies towards specific Internet-use disorders. *Brain Sciences*, 12(2), 201.  
<https://doi.org/10.3390/brainsci12020201>
34. Naaj, M. A., & Nachouki, M. (2021). Distance education during the COVID-19 pandemic: The impact of online gaming addiction on university students' performance. *International Journal of Advanced Computer Science and Applications*, 12(9).  
<https://doi.org/10.14569/IJACSA.2021.0120941>
35. Nugraha, Y. P., Awalya, A., & Mulawarman, M. (2021a). Predicting video game addiction: The effects of composite regulatory focus and interpersonal competence among Indonesian teenagers during COVID-19 pandemic. *Islamic Guidance and Counseling Journal*, 4(1), 66–77. <https://doi.org/10.25217/igcj.v4i1.1199>
36. Nugraha, Y. P., Awalya, A., & Mulawarman, M. (2021b). Video game addiction among students during COVID-19 pandemic based on regulatory focus theory and interpersonal competence. *Addictive Disorders & Their Treatment*, 20(4), 242–249.  
<https://doi.org/10.1097/ADT.0000000000000262>
37. Oka, T., Hamamura, T., Miyake, Y., Kobayashi, N., Honjo, M., Kawato, M., Kubo, T., & Chiba, T. (2021). Prevalence and risk factors of internet gaming disorder and problematic Internet use before and during the COVID-19 pandemic: A large online survey of Japanese adults. *Journal of Psychiatric Research*, 142, 218–225.  
<https://doi.org/10.1016/j.jpsychires.2021.07.054>
38. Oliveira, T. D. O., Costa, D. S., Alvim-Soares, A., de Paula, J. J., Kestelman, I., Silva, A. G., Malloy-Diniz, L. F., & Miranda, D. M. (2022). Children's behavioral problems, screen

time, and sleep problems' association with negative and positive parenting strategies during the COVID-19 outbreak in Brazil. *Child Abuse & Neglect*, 130, 105345.

<https://doi.org/10.1016/j.chiabu.2021.105345>

39. Paschke, K., Austermann, M. I., Simon-Kutscher, K., & Thomasius, R. (2021). Adolescent gaming and social media usage before and during the COVID-19 pandemic: Interim results of a longitudinal study. *SUCHT*, 67(1), 13–22. <https://doi.org/10.1024/0939-5911/a000694>
40. Phuah Rong Yao, J., Sundar, V., & Ramalingam, V. (2021). Predictors of mobile video gaming on musculoskeletal pain among university students in Selangor, Malaysia. *Revista Pesquisa em Fisioterapia*, 11(3), 518–527. <https://doi.org/10.17267/2238-2704rpf.v11i3.3916>
41. Rodda, S. N., Park, J. J., Wilkinson-Meyers, L., & King, D. L. (2022). The impact of COVID-19 on addiction treatment in New Zealand. *Addictive Behaviors*, 127, 107230. <https://doi.org/10.1016/j.addbeh.2021.107230>
42. Rozgonjuk, D., Pontes, H. M., Schivinski, B., & Montag, C. (2022). Disordered gaming, loneliness, and family harmony in gamers before and during the COVID-19 pandemic. *Addictive Behaviors Reports*, 15, 100426. <https://doi.org/10.1016/j.abrep.2022.100426>
43. Sallie, S. N., Ritou, V. J. E., Bowden-Jones, H., & Voon, V. (2021). Assessing online gaming and pornography consumption patterns during COVID-19 isolation using an online survey: Highlighting distinct avenues of problematic internet behavior. *Addictive Behaviors*, 123, 107044. <https://doi.org/10.1016/j.addbeh.2021.107044>
44. Saritepeci, M., Yildiz Durak, H., & Atman Uslu, N. (2022). A latent profile analysis for the study of multiple screen addiction, mobile social gaming addiction, general mattering, and



family sense of belonging in university students. *International Journal of Mental Health and Addiction*. <https://doi.org/10.1007/s11469-022-00816-y>

45. Savolainen, I., Vuorinen, I., Sirola, A., & Oksanen, A. (2022). Gambling and gaming during COVID-19: The role of mental health and social motives in gambling and gaming problems. *Comprehensive Psychiatry*, 117, 152331. <https://doi.org/10.1016/j.comppsy.2022.152331>
46. She, R., Wong, K., Lin, J., Leung, K., Zhang, Y., & Yang, X. (2021). How COVID-19 stress related to schooling and online learning affects adolescent depression and Internet gaming disorder: Testing Conservation of Resources theory with sex difference. *Journal of Behavioral Addictions*, 10(4), 953–966. <https://doi.org/10.1556/2006.2021.00069>
47. She, R., Wong, K., Lin, J., Zhang, Y., Leung, K., & Yang, X. (2022). Profiles of stress and coping associated with mental, behavioral, and Internet use problems among adolescents During the COVID-19 pandemic: A stratified random sampling and cluster analysis. *Frontiers in Public Health*, 10, 826911. <https://doi.org/10.3389/fpubh.2022.826911>
48. Shrestha, M. V., Manandhar, N., Sharma, S. C., & Joshi, S. K. (2020). Gaming disorder among medical college students during COVID-19 pandemic lockdown. *Kathmandu University Medical Journal*, 18(2), 48–52. <https://doi.org/10.3126/kumj.v18i2.32956>
49. Singh, S., Datta, M., Gupta, P., & Batra, S. (2022). Predictors of ‘problematic Internet use’ among adolescents and adults amid the pandemic in India. *Clinical Epidemiology and Global Health*, 15, 101036. <https://doi.org/10.1016/j.cegh.2022.101036>
50. Son, S., Oh, J., & Jeon, B. (2021). Correlational study between online friendship network and Internet game disorder among university students. *Brain and Behavior*, 11(11). <https://doi.org/10.1002/brb3.2392>

51. Teng, Z., Pontes, H. M., Nie, Q., Griffiths, M. D., & Guo, C. (2021). Depression and anxiety symptoms associated with Internet gaming disorder before and during the COVID-19 pandemic: A longitudinal study. *Journal of Behavioral Addictions*, 10(1), 169–180.  
<https://doi.org/10.1556/2006.2021.00016>
52. Ting, C. H., & Essau, C. (2021). Addictive behaviours among university students in Malaysia during COVID-19 pandemic. *Addictive Behaviors Reports*, 14, 100375.  
<https://doi.org/10.1016/j.abrep.2021.100375>
53. Tzang, R.-F., Chang, C.-H., & Chang, Y.-C. (2022). Structural Equation Modeling (SEM): Gaming disorder leading untreated Attention-Deficit/Hyperactivity Disorder to disruptive mood dysregulation. *International Journal of Environmental Research and Public Health*, 19(11), 6648. <https://doi.org/10.3390/ijerph19116648>
54. Volpe, U., Orsolini, L., Salvi, V., Albert, U., Carmassi, C., Carrà, G., Cirulli, F., Dell’Osso, B., Luciano, M., Menculini, G., Nanni, M., Pompili, M., Sani, G., Sampogna, G., Group, W., & Fiorillo, A. (2022). COVID-19-related social isolation predispose to problematic Internet and online video gaming use in Italy. *International Journal of Environmental Research and Public Health*, 19(3), 1539.  
<https://doi.org/10.3390/ijerph19031539>
55. Wang, Y., Liu, B., Zhang, L., & Zhang, P. (2022). Anxiety, depression, and stress are associated with Internet gaming disorder during COVID-19: Fear of missing out as a mediator. *Frontiers in Psychiatry*, 13, 827519. <https://doi.org/10.3389/fpsyt.2022.827519>
56. Werling, A. M., Walitza, S., Eliez, S., & Drechsler, R. (2022). Impact of the COVID-19 pandemic on mental health and family situation of clinically referred children and adolescents in Switzerland: Results of a survey among mental health care professionals

after 1 year of COVID-19. *Journal of Neural Transmission*, 129(5–6), 675–688.

<https://doi.org/10.1007/s00702-022-02512-6>

57. Wu, Q., Luo, T., Tang, J., Wang, Y., Wu, Z., Liu, Y., Chen, W., Deng, Q., & Liao, Y. (2022). Gaming in China before the COVID-19 pandemic and after the lifting of lockdowns: A nationwide online retrospective survey. *International Journal of Mental Health and Addiction*. <https://doi.org/10.1007/s11469-022-00792-3>
58. Xiang, G.-X., Gan, X., Jin, X., Zhang, Y.-H., & Zhu, C.-S. (2022). Developmental assets, self-control and Internet gaming disorder in adolescence: Testing a moderated mediation model in a longitudinal study. *Frontiers in Public Health*, 10, 808264. <https://doi.org/10.3389/fpubh.2022.808264>
59. Yang, X., Yip, B. H. K., Lee, E. K. P., Zhang, D., & Wong, S. Y. S. (2021). The relationship between technology use and problem technology use and potential psychosocial mechanisms: Population-based telephone survey in community adults during COVID-19. *Frontiers in Psychology*, 12, 696271. <https://doi.org/10.3389/fpsyg.2021.696271>
60. Zaman, M., Babar, M. S., Babar, M., Sabir, F., Ashraf, F., Tahir, M. J., Ullah, I., Griffiths, M. D., Lin, C.-Y., & Pakpour, A. H. (2022). Prevalence of gaming addiction and its impact on sleep quality: A cross-sectional study from Pakistan. *Annals of Medicine and Surgery*, 78, 103641. <https://doi.org/10.1016/j.amsu.2022.103641>
61. Zarco-Alpuente, A., Ciudad-Fernández, V., Ballester-Arnal, R., Billieux, J., Gil-Llario, M. D., King, D. L., Montoya-Castilla, I., Samper, P., & Castro-Calvo, J. (2021). Problematic Internet use prior to and during the COVID-19 pandemic. *Cyberpsychology: Journal of Psychosocial Research on Cyberspace*, 15(4). <https://doi.org/10.5817/CP2021-4-1>

62. Zhu, S., Zhuang, Y., Lee, P., Li, J. C.-M., & Wong, P. W. C. (2021). Leisure and problem gaming behaviors among children and adolescents during school closures caused by COVID-19 in Hong Kong: Quantitative cross-sectional survey study. *JMIR Serious Games*, 9(2), e26808. <https://doi.org/10.2196/26808>
