# Supplementary material for: Problematic Gaming during COVID-19 Pandemic: A Systematic Review, Meta-Analysis, and Meta-Regression
Source: MDPI journal article supplement (doi:10.3390/healthcare11243176), 2023-12-15
Supplement: s1 [file s1]

# Supplementary S6 – Risk of Bias (RoB) assessment with the Newcastle-Ottawa Scale

| <i>Record</i>                             | <i>RoB</i> | <i>Total</i> | <i>1</i> | <i>2</i> | <i>3</i> | <i>4</i> | <i>5</i> | <i>6</i> | <i>7</i> |
|-------------------------------------------|------------|--------------|----------|----------|----------|----------|----------|----------|----------|
| (Alqassim et al., 2022)                   | low        | 6            | 1        | 1        | 0.5      | 1.5      | 0.5      | 1        | 0.5      |
| (Al-Sharqi & Hasan, 2022)                 | high       | 4            | 1        | 0        | 0        | 1        | 0        | 1        | 1        |
| (Balhara et al., 2020)                    | high       | 3            | 1        | 0        | 0        | 1        | 0        | 1        | 0        |
| (Brailovskaia et al., 2022)               | low        | 7            | 1        | 1        | 1        | 1        | 1        | 1        | 1        |
| (C.-Y. Chen et al., 2022)                 | low        | 6            | 1        | 0.5      | 0.5      | 1.5      | 1        | 1        | 0.5      |
| (C.-Y. Chen, Chen, O'Brien, et al., 2021) | low        | 5            | 1        | 0.5      | 0        | 1        | 1        | 1        | 0.5      |
| (C.-Y. Chen, Chen, Pakpour, et al., 2021) | low        | 5.5          | 1        | 0.5      | 0        | 1.5      | 1        | 1        | 0.5      |
| (Cakiroglu et al., 2021)                  | high       | 4            | 1        | 0        | 0        | 0.5      | 0.5      | 1        | 1        |
| (Cena et al., 2022)                       | high       | 4            | 1        | 0        | 0        | 1        | 0        | 1        | 1        |
| (Chang et al., 2022)                      | low        | 5            | 1        | 0        | 0.5      | 1        | 0.5      | 1        | 1        |
| (Ciccarelli et al., 2022)                 | low        | 5            | 1        | 0.5      | 0        | 1        | 1        | 1        | 0.5      |
| (Claesdotter-Knutsson et al., 2022)       | low        | 6            | 1        | 0.5      | 0.5      | 1        | 1        | 1        | 1        |
| (Cuong et al., 2021)                      | low        | 8            | 1        | 1        | 1        | 2        | 1        | 1        | 1        |
| (De Pasquale et al., 2021)                | low        | 5            | 1        | 0.5      | 0        | 1.5      | 0.5      | 1        | 0.5      |
| (Donati et al., 2021)                     | low        | 5.5          | 1        | 0        | 0        | 2        | 0.5      | 1        | 1        |
| (Efrati & Spada, 2022)                    | low        | 5            | 1        | 0        | 0        | 1.5      | 0.5      | 1        | 1        |
| (Elhai et al., 2021)                      | low        | 5            | 1        | 0        | 0.5      | 1.5      | 0        | 1        | 1        |
| (Elsayed, 2021)                           | low        | 5            | 1        | 0.5      | 0        | 1        | 0.5      | 1        | 1        |
| (Fernandes et al., 2020)                  | low        | 5            | 1        | 0        | 0        | 1        | 1        | 1        | 1        |
| (Giardina et al., 2021)                   | low        | 6            | 1        | 0.5      | 0        | 1.5      | 1        | 1        | 1        |
| (Gómez Galán et al., 2021)                | low        | 5            | 1        | 0.5      | 0        | 1.5      | 0        | 1        | 1        |
| (Hall et al., 2021)                       | high       | 4.5          | 1        | 0.5      | 0        | 1        | 0.5      | 1        | 0.5      |
| (Higuchi et al., 2020)                    | high       | 2            | 1        | 0        | 0        | 0        | 0.5      | 0        | 0.5      |
| (I. H. Chen et al., 2021a)                | low        | 6            | 1        | 0.5      | 0        | 1.5      | 1        | 1        | 1        |
| (I. H. Chen et al., 2022a)                | low        | 5            | 1        | 0        | 0.5      | 1.5      | 0.5      | 1        | 0.5      |
| (I.-H. Chen et al., 2021b)                | low        | 6            | 1        | 0.5      | 0.5      | 1.5      | 1        | 1        | 0.5      |
| (I.-H. Chen et al., 2022b)                | low        | 5            | 1        | 0        | 0.5      | 1        | 1        | 1        | 0.5      |
| (Ismail et al., 2021)                     | low        | 5.5          | 1        | 0        | 0        | 1.5      | 1        | 1        | 1        |
| (Kim & Lee, 2021)                         | low        | 5            | 1        | 0        | 0        | 1        | 1        | 1        | 1        |
| (Kim et al., 2021)                        | low        | 6            | 1        | 0.5      | 1        | 1        | 1        | 1        | 0.5      |
| (Koós et al., 2022)                       | low        | 5            | 1        | 0.5      | 0        | 1        | 0.5      | 1        | 1        |
| (Maraz et al., 2021)                      | low        | 5            | 1        | 0        | 0.5      | 1        | 0.5      | 1        | 1        |

|                               |      |     |     |     |     |     |     |   |     |
|-------------------------------|------|-----|-----|-----|-----|-----|-----|---|-----|
| (Müller et al., 2022)         | low  | 5   | 1   | 0.5 | 0   | 1   | 0.5 | 1 | 1   |
| (Naaj & Nachouki, 2021)       | high | 2   | 0.5 | 0   | 0   | 0   | 0.5 | 1 | 0   |
| (Nugraha et al., 2021a)       | high | 4   | 1   | 0   | 0   | 1   | 0.5 | 1 | 0.5 |
| (Nugraha et al., 2021b)       | high | 4   | 1   | 0   | 0   | 1   | 0.5 | 1 | 0.5 |
| (Oka et al., 2021)            | low  | 5   | 1   | 0   | 0.5 | 1   | 0.5 | 1 | 1   |
| (Oliveira et al., 2022)       | low  | 6   | 1   | 0.5 | 0   | 1.5 | 1   | 1 | 1   |
| (Paschke et al., 2021)        | low  | 5   | 1   | 0   | 0.5 | 1.5 | 0   | 1 | 1   |
| (Rodda et al., 2022)          | high | 3   | 0.5 | 0   | 0   | 0   | 0.5 | 1 | 1   |
| (Rozgonjuk et al., 2022)      | low  | 6   | 1   | 0.5 | 0   | 2   | 1   | 1 | 0.5 |
| (Sallie et al., 2021)         | high | 4   | 1   | 0   | 0   | 1.5 | 0.5 | 1 | 0   |
| (Saritepeci et al., 2022)     | low  | 5   | 1   | 0   | 0   | 2   | 0   | 1 | 1   |
| (Savolainen et al., 2022)     | low  | 5   | 1   | 0.5 | 0   | 0.5 | 1   | 1 | 1   |
| (She et al., 2021)            | low  | 6   | 1   | 0.5 | 0   | 1.5 | 1   | 1 | 1   |
| (She et al., 2022)            | low  | 6   | 1   | 0   | 0   | 2   | 1   | 1 | 1   |
| (Shrestha et al., 2020)       | low  | 6   | 1   | 0.5 | 0.5 | 1.5 | 0.5 | 1 | 1   |
| (Singh et al., 2022)          | low  | 6   | 1   | 0.5 | 0.5 | 2   | 0.5 | 1 | 0.5 |
| (Son et al., 2021)            | low  | 5   | 1   | 0.5 | 0   | 2   | 0.5 | 1 | 0   |
| (Teng et al., 2021)           | low  | 5   | 1   | 0   | 0   | 1   | 1   | 1 | 1   |
| (Ting & Essau, 2021)          | low  | 5   | 1   | 0   | 0   | 1.5 | 0.5 | 1 | 1   |
| (Tzang et al., 2022)          | low  | 5   | 1   | 0   | 0   | 1.5 | 0.5 | 1 | 1   |
| (Volpe et al., 2022)          | low  | 5   | 1   | 0   | 0   | 1.5 | 0.5 | 1 | 1   |
| (Wang et al., 2022)           | low  | 6   | 1   | 0   | 0   | 2   | 1   | 1 | 1   |
| (Werling et al., 2022)        | high | 3   | 1   | 0   | 0   | 0   | 0   | 1 | 1   |
| (Wu et al., 2022)             | low  | 5   | 0.5 | 0.5 | 0   | 1.5 | 0.5 | 1 | 1   |
| (Xiang et al., 2022)          | low  | 6   | 1   | 0.5 | 0   | 2   | 1   | 1 | 0.5 |
| (Yang et al., 2021)           | low  | 6   | 1   | 0.5 | 0   | 1.5 | 1   | 1 | 1   |
| (Yao et al., 2021)            | low  | 5   | 1   | 0   | 0   | 1.5 | 0.5 | 1 | 1   |
| (Zaman et al., 2022)          | low  | 7   | 1   | 1   | 0.5 | 1.5 | 1   | 1 | 1   |
| (Zarco-Alpuente et al., 2021) | low  | 5.5 | 1   | 0   | 0   | 2   | 0.5 | 1 | 1   |
| (Zhu et al., 2021)            | low  | 7   | 1   | 1   | 1   | 1   | 1   | 1 | 1   |

*Note.* Level of accordance between the two reviewers = 91.32%. The reported values are the mean of the scores assigned by the two reviewers.
