# Supplementary material for: Problematic Gaming during COVID-19 Pandemic: A Systematic Review, Meta-Analysis, and Meta-Regression
Source: MDPI journal article supplement (doi:10.3390/healthcare11243176), 2023-12-15
Supplement: s1 [file s1]

**Supplementary S5.** List of excluded references ( $N = 86$ ) and reason for exclusion.

1. (wrong outcome) Akozlu, Z., Kolukisa, T., Ozturk Sahin, O., & Topan, A. (2021). Internet addiction and stressors causing Internet addiction in primary school children during the COVID-19 pandemic: A descriptive and cross-sectional study from Turkey. *ADDICTA: The Turkish Journal on Addictions*, 8(1), 65–72.  
<https://doi.org/10.5152/ADDICTA.2021.21032>
2. (wrong publication type) Albarello, F., Novoa, Á., Castro Sánchez, M., Velasco, A., Novaro Hueyo, M. V., & Narbais, F. (2021). The social dynamics of multiplayer online videogames in Argentinian and Chilean family contexts: The case of Fortnite. *Global Studies of Childhood*, 11(4), 302–317. <https://doi.org/10.1177/20436106211015997>
3. (wrong publication type) Amin, K. P., Griffiths, M. D., & Dsouza, D. D. (2022). Online gaming during the COVID-19 pandemic in India: Strategies for work-life balance. *International Journal of Mental Health and Addiction*, 20(1), 296–302.  
<https://doi.org/10.1007/s11469-020-00358-1>
4. (wrong study design) Arend, A.-K., Blechert, J., Pannicke, B., & Reichenberger, J. (2021). Increased screen use on days with increased perceived COVID-19-related confinements—A day level ecological momentary assessment study. *Frontiers in Public Health*, 8, 623205. <https://doi.org/10.3389/fpubh.2020.623205>
5. (wrong outcome) Ballard, M. E., & Spencer, M. T. (2022). Importance of social videogaming for connection with others during the COVID-19 pandemic. *Games and Culture*, 155541202210909. <https://doi.org/10.1177/15554120221090982>

6. (wrong outcome) Barr, M., & Copeland-Stewart, A. (2022). Playing video games during the COVID-19 pandemic and effects on players' well-being. *Games and Culture*, 17(1), 122–139. <https://doi.org/10.1177/15554120211017036>
7. (wrong population) Bellringer, M. E., & Garrett, N. (2021). Risk factors for increased online gambling during COVID-19 lockdowns in New Zealand: A longitudinal study. *International Journal of Environmental Research and Public Health*, 18(24), 12946. <https://doi.org/10.3390/ijerph182412946>
8. (wrong publication type) Bengtsson, T. T., Bom, L. H., & Fynbo, L. (2021). Playing apart together: Young people's online gaming during the COVID-19 lockdown. *YOUNG*, 29(4\_suppl), S65–S80. <https://doi.org/10.1177/11033088211032018>
9. (wrong publication type) Blake, E., & Sauermilch, D. (2021). Reconsidering Internet gaming disorder during the COVID-19 pandemic. *Journal of Technology in Behavioral Science*, 6(2), 348–351. <https://doi.org/10.1007/s41347-020-00184-1>
10. (wrong outcome) Boldi, A., Rapp, A., & Tirassa, M. (2022). Playing during a crisis: The impact of commercial video games on the reconfiguration of people's life during the COVID-19 pandemic. *Human–Computer Interaction*, 1–42. <https://doi.org/10.1080/07370024.2022.2050725>
11. (wrong outcome) Branquinho, C., Paiva, T., Guedes, F., Gaspar, T., Tomé, G., & Gaspar de Matos, M. (2022). Health risk behaviors before and during COVID-19 and gender differences. *Journal of Community Psychology*, 50(2), 1102–1110. <https://doi.org/10.1002/jcop.22705>
12. (wrong outcome) Canale, N., Marino, C., Lenzi, M., Vieno, A., Griffiths, M. D., Gaborardi, M., Giraldo, M., Cervone, C., & Santinello, M. (2022). How communication technology

- fosters individual and social wellbeing during the COVID-19 pandemic: Preliminary support for a digital interaction model. *Journal of Happiness Studies*, 23(2), 727–745.  
<https://doi.org/10.1007/s10902-021-00421-1>
13. (wrong outcome) Chae, S. W., & Lee, S. H. (2022). Sharing emotion while spectating video game play: Exploring Twitch users' emotional change after the outbreak of the COVID-19 pandemic. *Computers in Human Behavior*, 131, 107211.  
<https://doi.org/10.1016/j.chb.2022.107211>
  14. (wrong outcome) Chockalingam, S., Gayathri, R., Yuvaraj Babu, K., & Vishnu Priya, V. (2020). Online gaming and urban school children during lockdown-a survey. *International Journal of Pharmaceutical Research*, 12, 1613–1621.  
<https://doi.org/10.31838/ijpr/2020.SP2.188>
  15. (wrong publication type) Cowan, K., Potter, J., Olusoga, Y., Bannister, C., Bishop, J. C., Cannon, M., & Signorelli, V. (2021). Children's digital play during the COVID-19 pandemic: Insights from the play observatory. *Journal of E-Learning and Knowledge Society*, 17(3), 8–17. <https://doi.org/10.31838/ijpr/2020.SP2.188>
  16. (wrong publication type) Coward-Gibbs, M. (2021). Why don't we play pandemic? Analog gaming communities in lockdown. *Leisure Sciences*, 43(1), 78–84.  
<https://doi.org/10.1080/01490400.2020.1773986>
  17. (wrong outcome) Coyne, P., Staffell, Z., & Woodruff, S. J. (2021). Recreational screen time use among a small sample of Canadians during the first six months of the COVID-19 pandemic. *International Journal of Environmental Research and Public Health*, 18(23).  
<https://doi.org/10.3390/ijerph182312664>

18. (wrong outcome) Croissant, M., & Frister, M. (2021). A data-driven approach for examining the demand for relaxation games on Steam during the COVID-19 pandemic. *PLoS ONE*, 16(12), e0261328–e0261328. <https://doi.org/10.1371/journal.pone.0261328>
19. (not written in English) De Rostolan, T., & Bonnaire, C. (2022). Impact of the COVID-19 pandemic on gaming use according to personality and type of passion in adults. *Psychologie Française*, S0033298422000280. <https://doi.org/10.1016/j.psfr.2022.04.002>
20. (wrong publication type) Emmerich, K., Krekhov, A., & Krüger, J. (2020). “pls Uninstall”: On the interplay of the COVID-19 pandemic and toxic player behavior in competitive gaming. 224–228. <https://doi.org/10.1145/3383668.3419896>
21. (wrong publication type) Etchells, P. J., Davidson, B. I., Kaye, L. K., Ellis, D. A., & Lieberoth, A. (2022). Researchers should avoid causally attributing suicide to video game play as a single factor. *Perspectives in Psychiatric Care*, 58(2), 880–882. <https://doi.org/10.1111/ppc.12762>
22. (wrong publication type) Fazeli, S., Zeidi, I. M., Lin, C.-Y., Namdar, P., Griffiths, M. D., Ahorsu, D. K., & Pakpour, A. (2020). Corrigendum to “Depression, anxiety, and stress mediate the associations between internet gaming disorder, insomnia, and quality of life during the COVID-19 outbreak” [Addict. Behav. Rep. 12 (2020) 100307]. *Addictive Behaviors Reports*, 12, 100322. <https://doi.org/10.1016/j.abrep.2020.100322>
23. (wrong outcome) Fernandes, B., Uzun, B., Aydin, C., Tan-Mansukhani, R., Vallejo, A., Saldaña-Gutierrez, A., Nanda Biswas, U., & Essau, C. A. (2021). Internet use during COVID-19 lockdown among young people in low- and middle-income countries: Role of psychological wellbeing. *Addictive Behaviors Reports*, 14, 100379–100379. <https://doi.org/10.1016/j.abrep.2021.100379>

24. (wrong outcome) Fontana, M. T. (2020). Gamification of ChemDraw during the COVID-19 pandemic: Investigating how a serious, educational-game tournament (Molecule Madness) impacts student wellness and organic chemistry skills while distance learning. *Journal of Chemical Education*, 97(9), 3358–3368.  
<https://doi.org/10.1021/acs.jchemed.0c00722>
25. (wrong outcome) Formosa, J., Johnson, D., Türkay, S., & Mandryk, R. L. (2022). Need satisfaction, passion and wellbeing effects of videogame play prior to and during the COVID-19 pandemic. *Computers in Human Behavior*, 131, 107232–107232.  
<https://doi.org/10.1016/j.chb.2022.107232>
26. (wrong outcome) Fraser, A. M., Stockdale, L. A., Bryce, C. I., & Alexander, B. L. (2022). College students' media habits, concern for themselves and others, and mental health in the era of COVID-19. *Psychology of Popular Media*, 11(2), 139–151.  
<https://doi.org/10.1037/ppm0000345>
27. (wrong outcome) Freeland, L., O'reilly, M., Fleury, J., Adams, S., & Vostanis, P. (2022). Digital social and emotional literacy intervention for vulnerable children in Brazil: Participants' experiences. *International Journal of Mental Health Promotion*, 24(1), 51–67. <https://doi.org/10.32604/ijmh.2022.015706>
28. (wrong publication type) Gega, L., & Aboujaoude, E. (2021). How digital technology mediated the effects of the COVID-19 pandemic on mental health: The good, the bad, and the indifferent. *Frontiers in Digital Health*, 3, 733151–733151.  
<https://doi.org/10.3389/fdgth.2021.733151>
29. (wrong outcome) Gómez-Baya, D., Grasmeijer, A. J., López-Bermúdez, E., Gaspar de Matos, M., & Mendoza, R. (2022). Positive youth development and Internet use in a

sample of Spanish adolescents. *Frontiers in Pediatrics*, 10, 842928–842928.

<https://doi.org/10.3389/fped.2022.842928>

30. (wrong publication type) Handique, K., & Teronpi, J. (2022). *A study on Internet addiction disorder (IAD) and its related psychological factors during the COVID-19 lockdown* (rayyan-840249103). 107(1), 16323–16341. <https://doi.org/10.1149/10701.16323ecst>
31. (wrong outcome) Haug, E., Mæland, S., Lehmann, S., Bjørknes, R., Fadnes, L. T., Sandal, G. M., & Skogen, J. C. (2022). Increased gaming during COVID-19 predicts physical inactivity among youth in Norway—A two-wave longitudinal cohort study. *Frontiers in Public Health*, 10, 812932–812932. <https://doi.org/10.3389/fpubh.2022.812932>
32. (wrong outcome) Helbach, J., & Stahlmann, K. (2021). Changes in digital media use and physical activity in german young adults under the covid-19 pandemic: A cross-sectional study. *Journal of Sports Science and Medicine*, 20(4), 642–654.  
<https://doi.org/10.52082/jssm.2021.642>
33. (wrong study design) Hunt, D. (2022). Microtransaction spending and problematic gambling of UK university Call of Duty gamers. *International Gambling Studies*.  
<https://doi.org/10.1080/14459795.2022.2046843>
34. (wrong outcome) Kattula, D., Singh Balhara, Y. P., Chukkali, S., Singh, S., Bhargava, R., & Ganesh, R. (2021). Screen time beyond gaming and social media: Excessive and problematic use of Over The Top (OTT) platforms among college students during COVID-19 pandemic. *Psychiatria Danubina*, 33(Suppl 13), 420–423.
35. (wrong outcome) Kim, M. (2021). Does playing a video game really result in improvements in psychological well-being in the era of COVID-19? *Journal of Retailing and Consumer Services*, 61, 102577. <https://doi.org/10.1016/j.jretconser.2021.102577>

36. (wrong publication type) Kim, Y. H., Nauright, J., & Suveatwatanakul, C. (2020). The rise of E-Sports and potential for Post-COVID continued growth. *Sport in Society*, 23(11), 1861–1871. <https://doi.org/10.1080/17430437.2020.1819695>
37. (wrong publication type) King, D. L., Achab, S., Higuchi, S., Bowden-Jones, H., Müller, K. W., Billieux, J., Starcevic, V., Saunders, J. B., Tam, P., & Delfabbro, P. H. (2022). Gaming disorder and the COVID-19 pandemic: Treatment demand and service delivery challenges. *Journal of Behavioral Addictions*, 11(2), 243–248. <https://doi.org/10.1556/2006.2022.00011>
38. (wrong publication type) King, D. L., Delfabbro, P. H., Billieux, J., & Potenza, M. N. (2020). Problematic online gaming and the COVID-19 pandemic. *Journal of Behavioral Addictions*, 9(2), 184–186. <https://doi.org/10.1556/2006.2020.00016>
39. (wrong publication type) Király, O., Potenza, M. N., Stein, D. J., King, D. L., Hodgins, D. C., Saunders, J. B., Griffiths, M. D., Gjoneska, B., Billieux, J., Brand, M., Abbott, M. W., Chamberlain, S. R., Corazza, O., Burkauskas, J., Sales, C. M. D., Montag, C., Lochner, C., Grünblatt, E., Wegmann, E., ... Demetrovics, Z. (2020). Preventing problematic Internet use during the COVID-19 pandemic: Consensus guidance. *Comprehensive Psychiatry*, 100, 152180. <https://doi.org/10.1016/j.comppsy.2020.152180>
40. (wrong publication type) Ko, C.-H., & Yen, J.-Y. (2020). Impact of COVID-19 on gaming disorder: Monitoring and prevention. *Journal of Behavioral Addictions*, 9(2), 187–189. <https://doi.org/10.1556/2006.2020.00040>
41. (wrong publication type) Kowal, M., Conroy, E., Ramsbottom, N., Smithies, T., Toth, A., & Campbell, M. (2021). Gaming your mental health: A narrative review on mitigating

- symptoms of depression and anxiety using commercial video games. *JMIR Serious Games*, 9(2), e26575. <https://doi.org/10.2196/26575>
42. (wrong outcome) Krittanawong, C., Virk, H. U. H., Katz, C. L., Kaplin, S., Wang, Z., Gonzalez-Heydrich, J., Storch, E. A., & Lavie, C. J. (2022). Association of social gaming with well-being (Escape COVID-19): A sentiment analysis. *The American Journal of Medicine*, 135(2), 254–257. <https://doi.org/10.1016/j.amjmed.2021.10.010>
  43. (wrong publication type) Lamar, L., Craig, J. T., & Shubkin, C. D. (2021). So your patient is a gamer: An exploration of benefits and harms. *Current Opinion in Pediatrics*, 33(5), 530–534. <https://doi.org/10.1097/MOP.0000000000001053>
  44. (wrong outcome) Laniton, J. M., Vallar, J. B., & Cuarteros, K. G. (2022). University students' viewpoints: A coping mechanism amid the Covid-19 pandemic. *Canadian Journal of Family and Youth / Le Journal Canadien de Famille et de La Jeunesse*, 14(3), 20–31. <https://doi.org/10.29173/cjfy29790>
  45. (wrong outcome) Lemenager, T., Neissner, M., Koopmann, A., Reinhard, I., Georgiadou, E., Müller, A., Kiefer, F., & Hillemacher, T. (2020). COVID-19 lockdown restrictions and online media consumption in Germany. *International Journal of Environmental Research and Public Health*, 18(1), 14. <https://doi.org/10.3390/ijerph18010014>
  46. (not written in English) Lesimple, P., Verley, J.-B., Laplace, B., & Olliac, B. (2022). Jeux vidéo à l'adolescence: Paradoxes en temps de pandémie. *Neuropsychiatrie de l'Enfance et de l'Adolescence*, 70(1), 37–42. <https://doi.org/10.1016/j.neurenf.2021.10.002>
  47. (wrong outcome) Li, X., Vanderloo, L. M., Keown-Stoneman, C. D. G., Cost, K. T., Charach, A., Maguire, J. L., Monga, S., Crosbie, J., Burton, C., Anagnostou, E., Georgiades, S., Nicolson, R., Kelley, E., Ayub, M., Korczak, D. J., & Birken, C. S. (2021).



Screen use and mental health symptoms in Canadian children and youth during the COVID-19 pandemic. *JAMA Network Open*, 4(12), e2140875.

<https://doi.org/10.1001/jamanetworkopen.2021.40875>

48. (wrong publication type) Limone, P., & Toto, G. A. (2021). Psychological and emotional effects of digital technology on children in COVID-19 pandemic. *Brain Sciences*, 11(9), 1126. <https://doi.org/10.3390/brainsci11091126>
49. (wrong outcome) López-Cabarcos, M. Á., Ribeiro-Soriano, D., & Piñeiro-Chousa, J. (2020). All that glitters is not gold. The rise of gaming in the COVID-19 pandemic. *Journal of Innovation & Knowledge*, 5(4), 289–296. <https://doi.org/10.1016/j.jik.2020.10.004>
50. (wrong publication type) Mahapatra, S., Sharma, M., Amudhan, S., & Anand, N. (2021). Binge gaming and COVID-19: A looming crisis. *Journal of Mental Health and Human Behaviour*, 26(1), 83–83. [https://doi.org/10.4103/jmhbb.jmhbb\\_26\\_21](https://doi.org/10.4103/jmhbb.jmhbb_26_21)
51. (wrong population) Maldonado-Murciano, L., Guilera, G., Montag, C., & Pontes, H. M. (2022). Disordered gaming in esports: Comparing professional and non-professional gamers. *Addictive Behaviors*, 132, 107342. <https://doi.org/10.1016/j.addbeh.2022.107342>
52. (wrong study design) Mamun, M. A., Ullah, I., Usman, N., & Griffiths, M. D. (2022). PUBG-related suicides during the COVID-19 pandemic: Three cases from Pakistan. *Perspectives in Psychiatric Care*, 58(2), 877–879. <https://doi.org/10.1111/ppc.12640>
53. (wrong outcome) Manzano-León, A., Rodríguez-Ferrer, J. M., Aguilar-Parra, J. M., & Herranz-Hernández, R. (2022). Gamification and family leisure to alleviate the psychological impact of confinement due to COVID-19. *Children & Society*, 36(4), 433–449. <https://doi.org/10.1111/chso.12495>

54. (wrong outcome) Meriläinen, M. (2022). Pandemic rhythms: Adults' gaming in Finland during the spring 2020 COVID-19 restrictions. *Convergence*.  
<https://doi.org/10.1177/13548565221077582>
55. (wrong outcome) Ming, Y., Hongxian, S., & Wei, H. (2021). COVID-19 and the risk of gaming disorder: A reflection in the situation of regular epidemic prevention and control. *Chinese Journal of Psychiatry*, 54(2), 81–86.
56. (wrong outcome) Mingazova, E. N., Akimova, L. V., Moscow Center «Patriot. Sport», 107370, Moscow, Russia, Pozharskaya, E. N., Don State Technical University, 344000, Rostov-on-Don, Russia, Mingazov, R. N., & A. N. Kosygin Russian State University, 117997, Moscow, Russia. (2021). Health risks of school-age children with distance learning in the first months of the spread of COVID-19. *Problems of Social Hygiene Public Health and History of Medicine*, 29(Special Issue). <https://doi.org/10.32687/0869-866X-2021-29-s1-588-592>
57. (wrong outcome) Minian, N., Saiva, A., Gayapersad, A., Dragonetti, R., Proulx, C., Debergue, P., Lecce, J., Hussain, S., Desjardins, E., & Selby, P. (2022). Video game to attenuate pandemic-related stress from an equity lens: Development and usability study. *JMIR Formative Research*, 6(5), e36820–e36820. <https://doi.org/10.2196/36820>
58. (wrong outcome) Nan, D., Lee, H., Kim, Y., & Kim, J. H. (2022). My video game console is so cool! A coolness theory-based model for intention to use video game consoles. *Technological Forecasting and Social Change*, 176, 121451.  
<https://doi.org/10.1016/j.techfore.2021.121451>

59. (wrong publication type) Navarro, J. (2021). Fortnite: A context for child development in the U.S. during COVID-19 (and beyond). *Journal of Children and Media*, 15(1), 13–16.  
<https://doi.org/10.1080/17482798.2020.1858435>
60. (wrong outcome) Nilsson, A., Rosendahl, I., & Jayaram-Lindström, N. (2022). Gaming and social media use among adolescents in the midst of the COVID-19 pandemic. *Nordic Studies on Alcohol and Drugs*, 145507252210749.  
<https://doi.org/10.1177/14550725221074997>
61. (wrong outcome) Obana, T., Takubo, M., Orito, Y., Murata, K., Sai, H., & Okamoto, T. (2021). The online attention game for digital identity education: An exploratory study. *The Review of Socionetwork Strategies*, 15(1), 251–276. <https://doi.org/10.1007/s12626-021-00077-6>
62. (wrong outcome) Oflu, A., Bükülmez, A., Elmas, E., Tahta, E. G., & Çeleğin, M. (2021). Comparison of screen time and digital gaming habits of Turkish children before and during the coronavirus disease 2019 pandemic. *Turkish Archives of Pediatrics*, 56(1), 22–26.  
<https://doi.org/10.14744/TurkPediatriArs.2020.41017>
63. (wrong publication type) O’Loughlin, J., Pelletier, E., Loomis, E., & Alweis, R. (2022). A case of Internet gaming disorder: When #PlayApartTogether takes a dark turn. *Journal of Community Hospital Internal Medicine Perspectives*, 12(1), 32–35.  
<https://doi.org/10.55729/2000-9666.1005>
64. (wrong publication type) Pallavicini, F., Pepe, A., & Mantovani, F. (2022). The effects of playing video games on stress, anxiety, depression, loneliness, and gaming disorder during the early stages of the COVID-19 pandemic: PRISMA systematic review.

*Cyberpsychology, Behavior, and Social Networking*, 25(6), 334–354.

<https://doi.org/10.1089/cyber.2021.0252>

65. (not written in English) Pérez-Albéniz, A., Nuez, C., Lucas-Molina, B., Ezquerra, M., & Fonseca-Pedrero, E. (2022). Impact of lockdown on the addictive behavior of university students in La Rioja. *Adicciones*. <https://doi.org/10.20882/adicciones.1646>
66. (wrong outcome) Pop-Jordanova, N., & Loleska, S. (2021). Neuropsychological correlates of Internet addiction. *Prilozi*, 42(3), 17–28. <https://doi.org/10.2478/prilozi-2021-0031>
67. (wrong outcome) Prochnow, T., Hartnell, L., & Patterson, M. S. (2021). Depressive symptoms, developing friendships, and social support through online gaming: A mixed-method analysis of online gaming network communication. *Mental Health and Social Inclusion*, 25(3), 243–253. <https://doi.org/10.1108/MHSI-02-2021-0011>
68. (wrong publication type) Rahmawati, N. A., Setiawati, Y., Indah Ardani, G. A., Zain, E., & Pereira-Sanchez, V. (2022). Internet gaming disorder in an adolescent during the COVID-19 pandemic: A case report. *Pan African Medical Journal*, 41. <https://doi.org/10.11604/pamj.2022.41.224.33941>
69. (wrong outcome) Reuter, P. R., Forster, B. L., & Kruger, B. J. (2021). A longitudinal study of the impact of COVID-19 restrictions on students' health behavior, mental health and emotional well-being. *PeerJ*, 9, e12528. <https://doi.org/10.7717/peerj.12528>
70. (wrong publication type) Rogier, G., Zobel, S. B., & Velotti, P. (2021). COVID-19 and technological addiction: The role of loneliness. *European Psychiatry*, 64(S1), S560–S560. <https://doi.org/10.1192/j.eurpsy.2021.1493>
71. (wrong outcome) Ruiz-Palmero, J., Colomo-Magaña, E., Sánchez-Rivas, E., & Linde-Valenzuela, T. (2021). Study of the use and consumption of mobile devices in university

students. *Digital Education Review*, 39, 89–104. <https://doi.org/10.1344/der.2021.39.89-104>

72. (wrong publication type) Rumpf, H.-J., Brand, M., Wegmann, E., Montag, C., Müller, A., Müller, K., Wölfling, K., Stark, R., Steins-Löber, S., Hayer, T., Schlossarek, S., Hoffmann, H., Leménager, T., Lindenberg, K., Thomasius, R., Batra, A., Mann, K., te Wildt, B., Mößle, T., & Rehbein, F. (2020). The COVID-19 pandemic and behavioral addiction-New challenges for structural and behavioral prevention. *SUCHT*, 66(4), 212–216. <https://doi.org/10.1024/0939-5911/a000672>
73. (wrong outcome) Sciberras, E., Patel, P., Stokes, M. A., Coghill, D., Middeldorp, C. M., Bellgrove, M. A., Becker, S. P., Efron, D., Stringaris, A., Faraone, S. V., Bellows, S. T., Quach, J., Banaschewski, T., McGillivray, J., Hutchinson, D., Silk, T. J., Melvin, G., Wood, A. G., Jackson, A., ... Westrupp, E. (2022). Physical health, media use, and mental health in children and adolescents with ADHD during the COVID-19 pandemic in Australia. *Journal of Attention Disorders*, 26(4), 549–562. <https://doi.org/10.1177/1087054720978549>
74. (wrong outcome) Seguin, D., Kuenzel, E., Morton, J. B., & Duerden, E. G. (2021). School's out: Parenting stress and screen time use in school-age children during the COVID-19 pandemic. *Journal of Affective Disorders Reports*, 6, 100217–100217. <https://doi.org/10.1016/j.jadr.2021.100217>
75. (wrong publication type) Shahid, R., Kumari, S., & Doumas, S. (2021). COVID-19's impact on Internet gaming disorder among children and adolescents. *Current Psychiatry*, 20(7), 41–42. <https://doi.org/10.12788/cp.0152>

76. (wrong publication type) Shumaker, D., & Manning, C. (2021). Existential implications of internet gaming disorder (IGD). *The Humanistic Psychologist*.  
<https://doi.org/10.1037/hum0000265>
77. (wrong publication type) Situmorang, D. D. B. (2021). Expressive art therapies for treating online games addiction in COVID-19 outbreak: Why are they important? *Ethics, Medicine and Public Health*, 18, 100691. <https://doi.org/10.1016/j.jemep.2021.100691>
78. (wrong outcome) Ueno, C., & Yamamoto, S. (2022). The relationship between behavioral problems and screen time in children during COVID-19 school closures in Japan. *Scandinavian Journal of Child and Adolescent Psychiatry and Psychology*, 10(1), 1–8.  
<https://doi.org/10.21307/sjcapp-2022-001>
79. (wrong outcome) Vidal, I. M. G. (2021). Prevalence of the student's gender in their daily interactions with devices on the Internet. *Revista Española de Educación Comparada*, 39, 254–270. <https://doi.org/10.5944/reec.39.2021.27577>
80. (wrong outcome) Vuong, Q.-H., Ho, M.-T., La, V.-P., Le, T.-T., Nguyen, T. H. T., & Nguyen, M.-H. (2021). A multinational data set of game players' behaviors in a virtual world and environmental perceptions. *Data Intelligence*, 3(4), 606–630.  
[https://doi.org/10.1162/dint\\_a\\_00111](https://doi.org/10.1162/dint_a_00111)
81. (wrong outcome) Werling, A. M., Walitza, S., & Drechsler, R. (2021). Impact of the COVID-19 lockdown on screen media use in patients referred for ADHD to child and adolescent psychiatry: An introduction to problematic use of the internet in ADHD and results of a survey. *Journal of Neural Transmission*, 128(7), 1033–1043.  
<https://doi.org/10.1007/s00702-021-02332-0>

82. (wrong outcome) Werling, A. M., Walitza, S., Grünblatt, E., & Drechsler, R. (2021). Media use before, during and after COVID-19 lockdown according to parents in a clinically referred sample in child and adolescent psychiatry: Results of an online survey in Switzerland. *Comprehensive Psychiatry*, 109, 152260. <https://doi.org/10.1016/j.comppsy.2021.152260>
83. (wrong outcome) Werner, A. M., Petersen, J., Müller, K. W., Tibubos, A. N., Schäfer, M., Mülder, L. M., Reichel, J. L., Heller, S., Dietz, P., Wölfling, K., & Beutel, M. E. (2021). Prevalence of Internet addiction before and during the COVID-19 pandemic among students at Johannes Gutenberg University Mainz, Germany. *Suchttherapie*, 22(04), 183–193. <https://doi.org/10.1055/a-1653-8186>
84. (wrong outcome) Wu, Q., Chen, T., Zhong, N., Bao, J., Zhao, Y., Du, J., & Zhao, M. (2022). Changes of Internet behavior of adolescents across the period of COVID-19 pandemic in China. *Psychology, Health & Medicine*, 1–11. <https://doi.org/10.1080/13548506.2021.2019809>
85. (wrong outcome) Yee, A. Z. H., & Sng, J. R. H. (2022). Animal crossing and COVID-19: A qualitative study examining how video games satisfy basic psychological needs during the pandemic. *Frontiers in Psychology*, 13, 800683. <https://doi.org/10.3389/fpsyg.2022.800683>
86. (wrong publication type) Yousafzai, A. W., & Sherin, A. (2020). Internet gaming among children in the time of COVID-19: An emerging psychological problem. *Khyber Medical University Journal*, 12(4), 261–262. <https://doi.org/10.35845/kmuj.2020.21046>

**Update (5th December, 2022).  $N = 6$**

1. (wrong outcome) Bersani, F. S., Barchielli, B., Ferracuti, S., Panno, A., Carbone, G. A., Massullo, C., Farina, B., Corazza, O., Prevete, E., Tarsitani, L., Pasquini, M., Biondi, M., & Imperatori, C. (2022). The association of problematic use of social media and online videogames with aggression is mediated by insomnia severity: A cross-sectional study in a sample of 18- to 24-year-old individuals. *Aggressive Behavior*, 48(3), 348–355.  
<https://doi.org/10.1002/ab.22008>
2. (wrong outcome) Chen, I., Chen, H.-P., Gamble, J. H., Liao, X. L., Chen, X.-M., Yang, Y.-T. C., Pakpour, A. H., Griffiths, M. D., & Lin, C.-Y. (2022). Evaluating a cross-lagged panel model between problematic internet use and psychological distress and cross-level mediation of school administrator support on problematic internet use: The serial mediating role of psychological needs thwarting of online teaching and psychological distress. *Frontiers in Public Health*, 10, 987366. Scopus.  
<https://doi.org/10.3389/fpubh.2022.987366>
3. (wrong outcome) Jouhki, H., Savolainen, I., Sirola, A., & Oksanen, A. (2022). Escapism and excessive online behaviors: A three-wave longitudinal study in Finland during the COVID-19 pandemic. *International Journal of Environmental Research and Public Health*, 19(19). <https://doi.org/10.3390/ijerph191912491>
4. (wrong outcome) Sousa Tavares, H. L., Souza Costa, D., Soares, A. A., Kestelman, I., da Silva, A. G., Malloy-Diniz, L. F., de Paula, J. J., & de Miranda, D. M. (2022). Gaming addiction and screen time in a context of increase of internalizing symptoms: Moderation evaluation. *Clinical Child Psychology and Psychiatry*, 13591045221125328. Scopus.  
<https://doi.org/10.1177/13591045221125329>



5. (wrong outcome) Xiang, G., Gan, X., Jin, X., & Zhang, Y. (2022). The more developmental assets, the less internet gaming disorder? Testing the cumulative effect and longitudinal mechanism during the COVID-19 pandemic. *Current Psychology*, 1–12.  
<https://doi.org/10.1007/s12144-022-03790-9>
6. (wrong outcome) Yang, H., Huang, X., Hu, J., Thompson, J., & Flower, R. (2022). Achievements, challenges and global implications of China's carbon neutral pledge. *Frontiers of Environmental Science & Engineering*, 16(8).  
<https://doi.org/10.1007/s11783-022-1532-9>
