# Supplementary material for: Problematic Gaming during COVID-19 Pandemic: A Systematic Review, Meta-Analysis, and Meta-Regression
Source: MDPI journal article supplement (doi:10.3390/healthcare11243176), 2023-12-15
Supplement: s1 [file s1]

### Supplementary S3. List of contacted authors.

#### First database search (23 June, 2022)

| Reference                       | Date               | Data retrieved         |
|---------------------------------|--------------------|------------------------|
| Balhara et al., 2020 (198)      | 7-09-22            | Sample characteristics |
| Brailovskaia et al., 2022 (229) | 17-08-22           | Sample characteristics |
| Chen et al., 2021 (143)         | 10-08-22           | Sample characteristics |
| Chen et al., 2021 (156)         | 10-08-22           | Sample characteristics |
| Chen et al., 2021 (212)         | 10-08-22; 7-09-22  | Sample characteristics |
| Ciccarelli et al., 2022 (219)   | 17-08-22           | Sample characteristics |
| Ismail et al., 2021 (207)       | 10-08-22           | Sample characteristics |
| Rozgonjuk et al., 2022 (194)    | 17-08-22; 11-10-22 | None                   |
| Sallie et al., 2021 (214)       | 7-09-22            | Sample characteristics |
| Volpe et al., 2022 (199)        | 17-08-22; 14-10-22 | Sample characteristics |
| Wu et al., 2022 (208)           | 17-08-22; 07-07-22 | None                   |

#### Second database search (5 December, 2022)

| Reference                        | Date     | Data retrieved         |
|----------------------------------|----------|------------------------|
| Bersani et al., 2022 (253)       | 05-12-22 | None                   |
| Chen et al., 2022 (3) (255)      | 05-12-22 | Sample characteristics |
| Jouhki et al., 2022 (256)        | 05-12-22 | None                   |
| Sousa Tavares et al., 2022 (257) | 05-12-22 | None                   |
| Xiang et al., 2022 (258)         | 05-12-22 | None                   |
| Yang et al., 2022 (259)          | 05-12-22 | None                   |

## References

- Balhara, Y. S., Kattula, D., Singh, S., Chukkali, S., & Bhargava, R. (2020). Impact of lockdown following COVID-19 on the gaming behavior of college students. *Indian Journal of Public Health*, 64(6), 172. [https://doi.org/10.4103/ijph.IJPH\\_465\\_20](https://doi.org/10.4103/ijph.IJPH_465_20)
- Bersani, F. S., Barchielli, B., Ferracuti, S., Panno, A., Carbone, G. A., Massullo, C., Farina, B., Corazza, O., Prevete, E., Tarsitani, L., Pasquini, M., Biondi, M., & Imperatori, C. (2022). The association of problematic use of social media and online videogames with aggression is mediated by insomnia severity: A cross-sectional study in a sample of 18- to 24-year-old individuals. *Aggressive Behavior*, 48(3), 348–355. <https://doi.org/10.1002/ab.22008>
- Brailovskaia, J., Meier-Faust, J., Schillack, H., & Margraf, J. (2022). A two-week gaming abstinence reduces Internet Gaming Disorder and improves mental health: An experimental longitudinal intervention study. *Computers in Human Behavior*, 134, 107334. <https://doi.org/10.1016/j.chb.2022.107334>
- Chen, C.-Y., Chen, I.-H., O'Brien, K. S., Latner, J. D., & Lin, C.-Y. (2021). Psychological distress and internet-related behaviors between schoolchildren with and without overweight during the COVID-19 outbreak. *International Journal of Obesity*, 45(3), 677–686. <https://doi.org/10.1038/s41366-021-00741-5>
- Chen, C.-Y., Chen, I.-H., Pakpour, A. H., Lin, C.-Y., & Griffiths, M. D. (2021). Internet-related behaviors and psychological distress among schoolchildren during the COVID-19 school hiatus. *Cyberpsychology, Behavior, and Social Networking*, 24(10), 654–663. <https://doi.org/10.1089/cyber.2020.0497>
- Chen, I. H., Chen, C. Y., Liu, C. H., Ahorsu, D. K., Griffiths, M. D., Chen, Y. P., Kuo, Y. J., Lin, C. Y., Pakpour, A. H., & Wang, S. M. (2021). Internet addiction and psychological distress among Chinese schoolchildren before and during the COVID-19 outbreak: A latent class analysis. *Journal of Behavioral Addictions*, 10(3), 731–746. <https://doi.org/10.1556/2006.2021.00052>
- Chen, I., Chen, H., Gamble, J., Liao, X., Chen, X., Yang, Y., Pakpour, A., Griffiths, M., & Lin, C. (2022). Evaluating a cross-lagged panel model between problematic internet use and psychological distress and cross-level mediation of school administrator support on problematic internet use: The serial mediating role of psychological needs thwarting of online teaching and psychological distress. *Frontiers in Public Health*, 10, 987366. <https://doi.org/10.3389/fpubh.2022.987366>
- Ciccarelli, M., Nigro, G., D'Olimpio, F., Griffiths, M. D., Sacco, M., Pizzini, B., & Cosenza, M. (2022). The associations between loneliness, anxiety, and problematic gaming behavior during the COVID-19 pandemic: The mediating role of mentalization. *Mediterranean Journal of Clinical Psychology*, Vol 10, No 1 (2022). <https://doi.org/10.13129/2282-1619/MJCP-3257>
- Ismail, N., Tajjudin, A. I., Jaafar, H., Nik Jaafar, N. R., Baharudin, A., & Ibrahim, N. (2021). The relationship between Internet addiction, Internet gaming and anxiety among medical students in

- a Malaysian public university during COVID-19 pandemic. *International Journal of Environmental Research and Public Health*, 18(22), 11870.  
<https://doi.org/10.3390/ijerph182211870>
- Jouhki, H., Savolainen, I., Sirola, A., & Oksanen, A. (2022). Escapism and excessive online behaviors: A three-wave longitudinal study in Finland during the COVID-19 pandemic. *International Journal of Environmental Research and Public Health*, 19(19).  
<https://doi.org/10.3390/ijerph191912491>
- Rozgonjuk, D., Pontes, H. M., Schivinski, B., & Montag, C. (2022). Disordered gaming, loneliness, and family harmony in gamers before and during the COVID-19 pandemic. *Addictive Behaviors Reports*, 15, 100426. <https://doi.org/10.1016/j.abrep.2022.100426>
- Sallie, S. N., Ritou, V. J. E., Bowden-Jones, H., & Voon, V. (2021). Assessing online gaming and pornography consumption patterns during COVID-19 isolation using an online survey: Highlighting distinct avenues of problematic internet behavior. *Addictive Behaviors*, 123, 107044. <https://doi.org/10.1016/j.addbeh.2021.107044>
- Sousa Tavares, H. L., Souza Costa, D., Soares, A. A., Kestelman, I., da Silva, A. G., Malloy-Diniz, L. F., de Paula, J. J., & de Miranda, D. M. (2022). Gaming addiction and screen time in a context of increase of internalizing symptoms: Moderation evaluation. *Clinical Child Psychology and Psychiatry*, 13591045221125328. <https://doi.org/10.1177/13591045221125329>
- Volpe, U., Orsolini, L., Salvi, V., Albert, U., Carmassi, C., Carrà, G., Cirulli, F., Dell’Osso, B., Luciano, M., Menculini, G., Nanni, M., Pompili, M., Sani, G., Sampogna, G., Group, W., & Fiorillo, A. (2022). COVID-19-related social isolation predispose to problematic Internet and online video gaming use in Italy. *International Journal of Environmental Research and Public Health*, 19(3), 1539. <https://doi.org/10.3390/ijerph19031539>
- Wu, Q., Luo, T., Tang, J., Wang, Y., Wu, Z., Liu, Y., Chen, W., Deng, Q., & Liao, Y. (2022). Gaming in China before the COVID-19 pandemic and after the lifting of lockdowns: A nationwide online retrospective survey. *International Journal of Mental Health and Addiction*.  
<https://doi.org/10.1007/s11469-022-00792-3>
- Xiang, G., Gan, X., Jin, X., & Zhang, Y. (2022). The more developmental assets, the less internet gaming disorder? Testing the cumulative effect and longitudinal mechanism during the COVID-19 pandemic. *Current Psychology*, 1–12. <https://doi.org/10.1007/s12144-022-03790-9>
- Yan, E., Sun, R., Wu, A., Lai, D., & Lee, V. (2022). The impact of pandemic-related life stress on Internet gaming: Social cynicism and gaming motivation as serial mediators. *International Journal of Environmental Research and Public Health*, 19(14).  
<https://doi.org/10.3390/ijerph19148332>
