# Supplementary material for: Problematic Gaming during COVID-19 Pandemic: A Systematic Review, Meta-Analysis, and Meta-Regression
Source: MDPI journal article supplement (doi:10.3390/healthcare11243176), 2023-12-15
Supplement: s1 [file s1]

## Supplementary S7 – Events per studies

| <i>Record</i>                             | <i>N</i> | <i>event</i> |
|-------------------------------------------|----------|--------------|
| (Alqassim et al., 2022)                   | 423      | 17           |
| (Balhara et al., 2020)                    | 128      | 19           |
| (Brailovskaia et al., 2022)               | 140      | 2            |
| (Cakiroglu et al., 2021)                  | 410      | 22           |
| (Cena et al., 2022)                       | 502      | 22           |
| (Chang et al., 2022)                      | 1305     | 265          |
| (C.-Y. Chen, Chen, O'Brien, et al., 2021) | 1357     | 14           |
| (I. H. Chen et al., 2021)                 | 504      | 3            |
| (I.-H. Chen et al., 2021)                 | 535      | 4            |
| (C.-Y. Chen, Chen, Pakpour, et al., 2021) | 2026     | 17           |
| (I. Chen et al., 2022)                    | 980      | 16           |
| (C.-Y. Chen et al., 2022)                 | 575      | 5            |
| (I.-H. Chen et al., 2022)                 | 272      | 3            |
| (Ciccarelli et al., 2022)                 | 466      | 1            |
| (Claesdotter-Knutsson et al., 2022)       | 932      | 60           |
| (Cuong et al., 2021)                      | 2084     | 242          |
| (De Pasquale et al., 2021)                | 162      | 0            |
| (Efrati & Spada, 2022)                    | 1813     | 550          |
| (Gómez Galán et al., 2021)                | 310      | 51           |
| (Hall et al., 2021)                       | 1144     | 36           |
| (Kim et al., 2021)                        | 2984     | 114          |
| (Koós et al., 2022)                       | 1043     | 11           |
| (Müller et al., 2022)                     | 174      | 13           |
| (Nugraha et al., 2021a)                   | 1046     | 136          |
| (Nugraha et al., 2021b)                   | 1046     | 120          |
| (Oka et al., 2021)                        | 51246    | 2088         |
| (Rozgonjuk et al., 2022)                  | 299      | 41           |
| (Sallie et al., 2021)                     | 1344     | 89           |
| (Savolainen et al., 2022)                 | 1530     | 15           |
| (She et al., 2021)                        | 3136     | 464          |
| (Shrestha et al., 2020)                   | 260      | 22           |
| (Teng et al., 2021)                       | 1778     | 89           |

|                      |      |     |
|----------------------|------|-----|
| (Ting & Essau, 2021) | 178  | 8   |
| (Volpe et al., 2022) | 1385 | 29  |
| (Wu et al., 2022)    | 5268 | 264 |
| (Yang et al., 2021)  | 177  | 15  |
| (Zaman et al., 2022) | 618  | 44  |
| (Zhu et al., 2021)   | 2848 | 152 |

---
