# Supplementary material for: Problematic Gaming during COVID-19 Pandemic: A Systematic Review, Meta-Analysis, and Meta-Regression
Source: Healthcare (Basel). 2023 Dec 15;11(24):3176. doi: 10.3390/healthcare11243176 (PMC10742917; doi:10.3390/healthcare11243176)
Supplement: Supplementary file 1 [file healthcare-11-03176-s001.zip]

Archive with 7 entries (7 files):
- S1 - PRISMA checklist.pdf
- S2 - Search strategy.pdf
- S3 - Contacted authors.pdf
- S4 - Included.pdf
- S5 - Excluded.pdf
- S6 - Risk of Bias.pdf
- S7 - Events per study.pdf
